# Supplementary material for: Pressure Overload Greatly Promotes Neonatal Right Ventricular Cardiomyocyte Proliferation: A New Model for the Study of Heart Regeneration
Source: PubMed Central journal article supplement — J Am Heart Assoc. 2020 Jun 28;9(11):e015574. doi: 10.1161/JAHA.119.015574 (PMC7429015; doi:10.1161/jaha.119.015574), 2020-06-28
Supplement: JAH3-9-e015574-s001.pdf [file JAH3-9-e015574-s001.pdf]

# **SUPPLEMENTAL MATERIAL**

**Table S1. Primer information.**

| Gene         |         | Sequence (5' -> 3')          |
|--------------|---------|------------------------------|
| COL1A1       | Forward | CTCAAGATGTGCCACTCTGACT       |
|              | Reverse | GAGGGAGTTTACAGGAAGCAGAC      |
| COL3A1       | Forward | TGGCGGCTTTTCACCATATT         |
|              | Reverse | ACTCTCTATTTGTCCGTTAACAGACTTG |
| AURKB        | Forward | CAGTGGGACACCCGACATC          |
|              | Reverse | GTACACGTTTCCAACTTGCC         |
| CCND1        | Forward | GATCGGGCATCACCTGAAAAA        |
|              | Reverse | TCGTCTGGTATCTTACCTACTCG      |
| Mki67        | Forward | ACGCCTGGTACTATCAAAGG         |
|              | Reverse | CAGACCCATTTACTTGTGTTGGA      |
| Ccnd3        | Forward | TACCCGCCATCCATGATCG          |
|              | Reverse | AGGCAGTCCACTTCAGTGC          |
| Bnp          | Forward | CCTCTTCTGGCCTTTTGG           |
|              | Reverse | TGTGTTGGACACCGCACTGT         |
| Anp          | Forward | GCTGCAGACTCCGGCTTCT          |
|              | Reverse | ATCACTTGAGAGGTGGTCCCA        |
| Rrm2         | Forward | GCCGAGCTGGAAAGTAAAGC         |
|              | Reverse | TCATGGTACTCGATGGGAAAGA       |
| Pclaf        | Forward | ATGGTGGGACTAAAGCAGAC         |
|              | Reverse | CCTCGATGAAACTGATGTGCAAT      |
| Mcm6         | Forward | GAGGAACTGATTCGTCCTGAGA       |
|              | Reverse | CAAGGCCCGACACAGGTAAG         |
| LOC100359539 | Forward | GGGGCGGTGATCTCTACAC          |
|              | Reverse | GGGAGTCGGACATTATTGACCA       |
| TCF19        | Forward | GGGGCGGTGATCTCTACAC          |
|              | Reverse | GGGAGTCGGACATTATTGACCA       |
| Spc24        | Forward | GCCTTCCGCGACATAGAGG          |
|              | Reverse | CCTGCTCCTTCGATTGAGA          |
| Ncaph        | Forward | GTCCTCGAAGACTTTCCTCAGA       |
|              | Reverse | TGAAATGTCAATACTCCTGCTGG      |
| Pbk          | Forward | CCAAACATTGTTGGTTATCGTGC      |
|              | Reverse | GGCTGGCTTTATATCGTTCTTCT      |
| Prim1        | Forward | ATGGAGACGTTTGACCCAC          |
|              | Reverse | CGTAGTTGAGCCAGCGATAGT        |
| Smc2         | Forward | TCTCAGGTTCCGGCTTCTAAT        |
|              | Reverse | CCTGTA CTCTGGTGTGTTGG        |
| Plk4         | Forward | AAGCTCGACACTTCATGCACC        |
|              | Reverse | GCATTTTCAGTTGAGTTGCCAG       |
| Dynll1       | Forward | AGAGATGCAACAGGACTCGGT        |
|              | Reverse | CCAGGTGGGATTGTA CTCTTG       |
| Mastl        | Forward | GACTGAGGAGGGCGTGAATAG        |
|              | Reverse | AGCTTGGACCTGATGAGTCATA       |
| Oxct1        | Forward | GTTGGTGGTTTTGGCTATGT         |
|              | Reverse | AGACCATGCGTTTTATCTGCTT       |
| Cavin2       | Forward | CATCCGGGACA ACTCACAGG        |
|              | Reverse | CAGCGTCTAGCATGTTACCA         |
| Tk1          | Forward | GGGCAGATCCAGGTGATTCTC        |
|              | Reverse | TGTAGCGAGTGTCTTTGGCATA       |

|         |         |                         |
|---------|---------|-------------------------|
| Khdrbs1 | Forward | GGAGCCAGAGAACAAGTACCT   |
|         | Reverse | CATGGCGTGAGTGAAGGAC     |
| Dnmt1   | Forward | AGGCGGCTCAAAGATTTGGAA   |
|         | Reverse | GCAGAAATTCGTGCAAGAGATTC |
| Top2a   | Forward | ACCATTGCAGCCTGTAAATGA   |
|         | Reverse | GGGCGGAGCAAAATATGTTCC   |
| Melk    | Forward | TCTCCAGTAGCATTCTGCTT    |
|         | Reverse | TGATCCAGGGATGGTTCAATAGA |
| Tuba1b  | Forward | ACCTTAACCGCCTTATTAGCCA  |
|         | Reverse | CACCACGGTACAACAGGCA     |
| Mms22l  | Forward | TGGACACCTATCTGAACCTCCC  |
|         | Reverse | ATGCCATGACGGTGGAAAAAG   |
| Uhrf1   | Forward | GCCATACCCTCTTCGACTACG   |
|         | Reverse | GCCCAATTCCGTCTCATCC     |

**Table S2. Reagents.**

| Name                                  | Company                                         | Catalog No. |
|---------------------------------------|-------------------------------------------------|-------------|
| Triton X-100                          | Sigma-Aldrich                                   | T9284       |
| HBSS                                  | ThermoFisher Scientific,<br>Pittsburgh, PA, USA | 14175103    |
| DNase                                 | Worthington, Lakewood, NJ,<br>USA               | 9003-98-9   |
| RNase                                 | Worthington, Lakewood, NJ,<br>USA               | 9001-99-4   |
| paraformaldehyde(PFA)                 | Sigma-Aldrich                                   | 158127      |
| 4',6-diamidino-2-phenylindole(DAPI)   | ThermoFisher Scientific)                        | D3571       |
| EdU Kit                               | Invitrogen                                      | C10337      |
| PureLink RNA Micro Scale Kit          | Life Technologies, Carlsbad,<br>California, USA | 12183016    |
| PrimeScript™ reagent kit              | Takara Bio, Kusatsu, Japan                      | RR037A      |
| SYBR Green Power Premix Kits          | Applied Biosystems, Foster<br>City, California  | 4368577     |
| RIPA lysis buffer                     | Beyotime, Shanghai, China                       | P0013B      |
| NEB Next® Ultra™ RNA Library Prep Kit | NEB, USA                                        | E7760       |
| TruSeq PE Cluster Kit                 | Illumina                                        | v3-cBot-HS  |

**Table S3. Antibodies.**

| Name                         | Company  | Catalog No. |
|------------------------------|----------|-------------|
| cardiac troponin T           | Abcam    | ab8295      |
| sarcomeric $\alpha$ -actinin | Abcam    | ab9465      |
| Ki67                         | Abcam    | ab15580     |
| phosphorylated histone H3    | Milipore | 06-570      |
| aurora B                     | Abcam    | ab2254      |
| collagen IV                  | Abcam    | ab6585      |

|             |       |         |
|-------------|-------|---------|
| collagen II | Abcam | ab34712 |
| GAPDH       | Abcam | ab8245  |

---

**Table S4. Top 24 upregulated genes.**

| gene_id            | OWOP1    | OWOP2    | OWOP3    | OWOP4    | OWOP5    | OWOP6    | OWCON1   |
|--------------------|----------|----------|----------|----------|----------|----------|----------|
| ENSRNOG00000016561 | 273.4829 | 231.5473 | 357.1895 | 353.1868 | 319.7178 | 278.3281 | 47.80062 |
| ENSRNOG00000054286 | 683.7071 | 622.605  | 933.4951 | 561.2283 | 626.8788 | 538.7381 | 95.60125 |
| ENSRNOG00000003703 | 919.6343 | 877.307  | 1083.575 | 828.5375 | 880.9144 | 850.5133 | 296.1931 |
| ENSRNOG00000008450 | 520.9656 | 379.0515 | 623.3306 | 482.608  | 439.4913 | 351.1951 | 66.57944 |
| ENSRNOG00000058288 | 211.8529 | 198.9592 | 209.1109 | 263.6805 | 230.8537 | 191.1266 | 69.14019 |
| ENSRNOG00000029862 | 404.4465 | 316.448  | 450.2388 | 400.359  | 379.6046 | 322.5261 | 132.3053 |
| ENSRNOG00000012051 | 691.4109 | 617.4595 | 837.4442 | 764.4317 | 733.1294 | 597.2706 | 262.0498 |
| ENSRNOG00000015308 | 376.5204 | 300.1539 | 384.2038 | 338.6723 | 332.2747 | 272.3554 | 63.16511 |
| ENSRNOG00000031993 | 816.5967 | 794.9791 | 995.528  | 897.4815 | 898.3009 | 870.8205 | 371.3084 |
| ENSRNOG00000022325 | 1196.969 | 1234.061 | 1464.777 | 1285.745 | 1206.428 | 950.8548 | 444.7165 |
| ENSRNOG00000011654 | 364.9648 | 346.4634 | 453.2404 | 373.749  | 437.5595 | 359.5569 | 163.0343 |
| ENSRNOG00000011222 | 3485.943 | 2979.242 | 3413.811 | 2742.036 | 2752.858 | 2569.458 | 1438.287 |
| ENSRNOG00000054474 | 285.0385 | 238.408  | 297.1576 | 310.8527 | 251.1379 | 222.1847 | 84.50467 |
| ENSRNOG00000043094 | 7277.148 | 8242.226 | 8049.269 | 6368.248 | 6687.029 | 4183.283 | 1916.293 |
| ENSRNOG00000025895 | 4321.8   | 4195.294 | 4551.414 | 5081.293 | 4689.517 | 4191.645 | 2407.956 |
| ENSRNOG00000047314 | 1208.525 | 899.6042 | 1207.641 | 918.0437 | 1083.757 | 973.5511 | 392.648  |
| ENSRNOG00000046794 | 2315.938 | 2319.761 | 2327.234 | 2371.915 | 2237.059 | 2236.181 | 1678.997 |
| ENSRNOG00000039859 | 1518.6   | 1354.981 | 1645.873 | 1331.708 | 1453.702 | 1380.89  | 704.2056 |
| ENSRNOG00000053047 | 3165.275 | 2788.859 | 2936.558 | 2590.843 | 2705.528 | 2094.031 | 1224.037 |
| ENSRNOG00000013598 | 268.668  | 212.6805 | 299.1587 | 258.8424 | 225.0582 | 236.5192 | 72.55452 |
| ENSRNOG00000053468 | 11191.61 | 9963.395 | 12668.72 | 11016.52 | 10956.37 | 8328.341 | 4733.115 |
| ENSRNOG00000006996 | 376.5204 | 367.9029 | 479.2542 | 445.1121 | 372.8432 | 352.3897 | 114.3801 |
| ENSRNOG00000005659 | 854.1524 | 689.4964 | 891.4728 | 783.7844 | 747.6182 | 677.3049 | 365.3333 |
| ENSRNOG00000048411 | 723.1888 | 610.5988 | 793.4208 | 576.9524 | 738.9249 | 659.3867 | 194.6168 |

| OWCON2   | OWCON3   | OWCON4   | OWCON5   | OWCON6   | Opt1w    | Con1w    | log2FoldCh | pvalue   |
|----------|----------|----------|----------|----------|----------|----------|------------|----------|
| 53.82467 | 49.06721 | 49.1797  | 58.37299 | 39.2052  | 302.2421 | 49.57507 | 2.611407   | 1.05E-59 |
| 106.4532 | 99.22481 | 91.69096 | 127.8167 | 75.73733 | 661.1087 | 99.42071 | 2.737093   | 1.65E-59 |
| 267.9272 | 278.0475 | 265.0702 | 206.3183 | 211.1735 | 906.7469 | 254.1217 | 1.835709   | 2.31E-55 |
| 102.8649 | 71.96525 | 92.52451 | 89.57234 | 98.90404 | 466.107  | 87.06842 | 2.42227    | 2.78E-44 |
| 55.02077 | 55.60951 | 63.35012 | 54.34726 | 52.57062 | 217.5973 | 58.33974 | 1.891693   | 3.72E-43 |
| 123.1987 | 119.9421 | 105.8614 | 107.6881 | 98.90404 | 378.9372 | 114.6499 | 1.726325   | 9.30E-41 |
| 235.6324 | 240.9745 | 270.9051 | 266.7042 | 209.3914 | 706.8577 | 247.6096 | 1.512346   | 2.19E-40 |
| 77.74674 | 77.41716 | 41.67771 | 86.55305 | 51.67959 | 334.0301 | 66.37323 | 2.341963   | 9.86E-40 |
| 316.9675 | 432.8819 | 385.9356 | 387.4759 | 359.084  | 878.9511 | 375.6089 | 1.225466   | 2.25E-39 |
| 434.1857 | 444.8761 | 539.3095 | 459.9389 | 432.1483 | 1223.139 | 459.1958 | 1.412882   | 3.42E-37 |
| 147.1208 | 152.6536 | 160.876  | 140.9003 | 151.4747 | 389.2557 | 152.6766 | 1.348381   | 1.79E-36 |
| 1304.949 | 1286.651 | 1293.676 | 1200.672 | 1182.393 | 2990.558 | 1284.438 | 1.219458   | 3.38E-35 |
| 95.6883  | 85.04984 | 91.69096 | 94.6045  | 71.28219 | 267.4632 | 87.13674 | 1.62034    | 1.07E-34 |
| 1716.409 | 2039.015 | 1589.588 | 2066.202 | 1660.875 | 6801.201 | 1831.397 | 1.893055   | 1.07E-33 |
| 2285.754 | 2107.709 | 2629.03  | 2483.871 | 2344.293 | 4505.161 | 2376.436 | 0.922225   | 1.40E-32 |
| 391.1259 | 358.7358 | 290.0768 | 330.1093 | 240.5774 | 1048.52  | 333.8789 | 1.652762   | 2.28E-31 |
| 1560.915 | 1612.676 | 1508.733 | 1581.103 | 1579.792 | 2301.348 | 1587.036 | 0.536062   | 1.13E-30 |
| 810.9583 | 704.3871 | 721.8579 | 630.0257 | 609.4627 | 1447.625 | 696.8162 | 1.056133   | 1.58E-30 |
| 1246.34  | 1068.575 | 1017.77  | 1164.44  | 982.8032 | 2713.515 | 1117.328 | 1.280817   | 1.76E-30 |
| 64.5896  | 55.60951 | 89.1903  | 57.36656 | 42.76931 | 250.1545 | 63.67997 | 1.968585   | 6.51E-30 |
| 5069.088 | 5077.911 | 5079.679 | 4490.694 | 4429.297 | 10687.49 | 4813.297 | 1.150927   | 8.85E-30 |
| 133.9636 | 137.3882 | 116.6976 | 73.46945 | 82.86555 | 399.0037 | 109.7941 | 1.864984   | 1.70E-29 |
| 367.2038 | 288.9514 | 326.7532 | 377.4116 | 326.116  | 773.9715 | 341.9616 | 1.178754   | 4.78E-29 |
| 300.222  | 246.4264 | 225.8932 | 282.8071 | 201.3722 | 683.7454 | 241.8896 | 1.503354   | 1.52E-28 |

| padj     | gene_name    | gene_chr | gene_start | gene_end | gene_stran | gene_length |
|----------|--------------|----------|------------|----------|------------|-------------|
| 1.55E-55 | Pclaf        | 8        | 71514281   | 71526182 | +          | 333         |
| 1.55E-55 | Rrm2         | 6        | 43884678   | 43889515 | +          | 1173        |
| 1.45E-51 | Mcm6         | 13       | 45042882   | 45068077 | -          | 2917        |
| 1.31E-40 | LOC100359539 | 19       | 25391700   | 25394229 | +          | 2530        |
| 1.41E-39 | Tcf19        | 20       | 3744395    | 3746964  | +          | 838         |
| 2.93E-37 | Spc24        | 8        | 22780725   | 22785671 | -          | 865         |
| 5.90E-37 | Ncaph        | 3        | 1.2E+08    | 1.2E+08  | -          | 2848        |
| 2.33E-36 | Pbk          | 15       | 42489377   | 42500395 | +          | 1830        |
| 4.71E-36 | Prim1        | 7        | 2435553    | 2451165  | +          | 1596        |
| 6.45E-34 | Smc2         | 5        | 68717519   | 68763850 | +          | 5373        |
| 3.07E-33 | Plk4         | 2        | 1.28E+08   | 1.28E+08 | +          | 3466        |
| 5.31E-32 | Dynll1       | 12       | 47074200   | 47076572 | +          | 652         |
| 1.56E-31 | Mastl        | 17       | 89742140   | 89876825 | +          | 5433        |
| 1.45E-30 | Oxct1        | 2        | 53859737   | 54007756 | +          | 3331        |
| 1.77E-29 | Cavin2       | 9        | 55243255   | 55256340 | -          | 3189        |
| 2.69E-28 | Tk1          | 10       | 1.07E+08   | 1.07E+08 | -          | 2218        |
| 1.25E-27 | Khdrbs1      | 5        | 1.48E+08   | 1.48E+08 | -          | 2622        |
| 1.65E-27 | Dnmt1        | 8        | 21922515   | 21968495 | -          | 5917        |
| 1.66E-27 | Top2a        | 10       | 86901007   | 86932154 | -          | 5589        |
| 5.85E-27 | Melk         | 5        | 59783890   | 59844356 | +          | 2842        |
| 7.60E-27 | Tuba1b       | 7        | 1.41E+08   | 1.41E+08 | -          | 1608        |
| 1.39E-26 | Mms22l       | 5        | 38844488   | 38961035 | +          | 4483        |
| 3.76E-26 | Aurkb        | 10       | 55626741   | 55634991 | +          | 4404        |
| 1.12E-25 | Uhrf1        | 9        | 10738222   | 10757954 | -          | 3856        |

| gene_biotype   | gene_description                                                                                   |
|----------------|----------------------------------------------------------------------------------------------------|
| protein_coding | PCNA clamp associated factor [Source:RGD Symbol;Acc:1303041]                                       |
| protein_coding | ribonucleotide reductase regulatory subunit M2 [Source:RGD Symbol;Acc:15983]                       |
| protein_coding | minichromosome maintenance complex component 6 [Source:RGD Symbol;Acc:1302974]                     |
| protein_coding | ribonucleotide reductase M2 polypeptide [Source:RGD Symbol;Acc:2323655]                            |
| protein_coding | transcription factor 19 [Source:RGD Symbol;Acc:1302974]                                            |
| protein_coding | SPC24, NDC80 kinetochore complex component [Source:RGD Symbol;Acc:13076]                           |
| protein_coding | non-SMC condensin I complex, subunit H [Source:RGD Symbol;Acc:1596799]                             |
| protein_coding | PDZ binding kinase [Source:RGD Symbol;Acc:1309565]                                                 |
| protein_coding | DNA primase subunit 1 [Source:RGD Symbol;Acc:621380]                                               |
| protein_coding | structural maintenance of chromosomes 2 [Source:RGD Symbol;Acc:1305227]                            |
| protein_coding | polo-like kinase 4 [Source:RGD Symbol;Acc:1305390]                                                 |
| protein_coding | dynein light chain LC8-type 1 [Source:RGD Symbol;Acc:619866]                                       |
| protein_coding | microtubule associated serine/threonine kinase-like [Source:MGI Symbol;Acc:MI000000000]            |
| protein_coding | 3-oxoacid CoA transferase 1 [Source:RGD Symbol;Acc:1584008]                                        |
| protein_coding | caveolae associated protein 2 [Source:RGD Symbol;Acc:1359345]                                      |
| protein_coding | thymidine kinase 1 [Source:RGD Symbol;Acc:621014]                                                  |
| protein_coding | KH RNA binding domain containing, signal transduction associated 1 [Source:RGD Symbol;Acc:1305227] |
| protein_coding | DNA methyltransferase 1 [Source:RGD Symbol;Acc:620979]                                             |
| protein_coding | DNA topoisomerase II alpha [Source:RGD Symbol;Acc:62048]                                           |
| protein_coding | maternal embryonic leucine zipper kinase [Source:RGD Symbol;Acc:1308974]                           |
| protein_coding | tubulin, alpha 1B [Source:RGD Symbol;Acc:1565476]                                                  |
| protein_coding | MMS22-like, DNA repair protein [Source:RGD Symbol;Acc:1304693]                                     |
| protein_coding | aurora kinase B [Source:RGD Symbol;Acc:621625]                                                     |
| protein_coding | ubiquitin-like with PHD and ring finger domains 1 [Source:RGD Symbol;Acc:1595227]                  |



---

---

10]  
61967]

31]

GI:1914371]

Symbol;Acc:621459]

855]

---

**Figure S1. Flow cytometry indicates that ~99% of purified cells were cTnT- positive.**

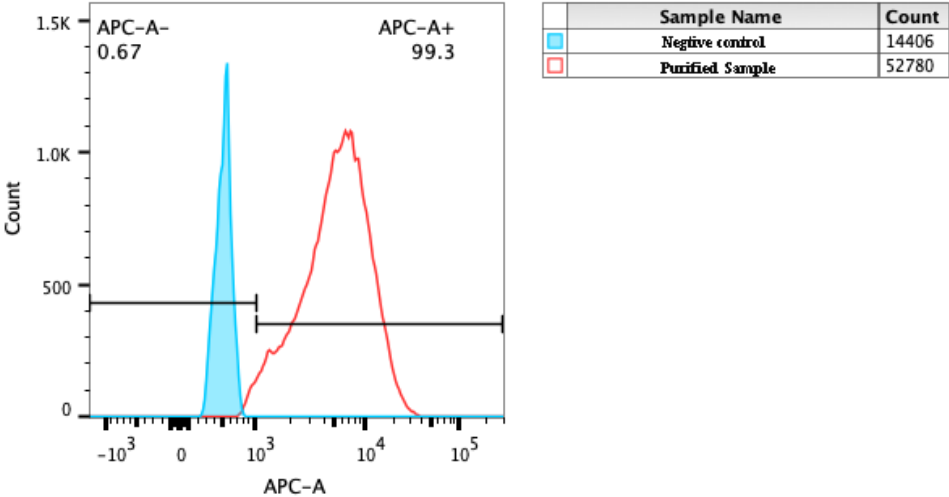

**Figure S2. qRT-PCR confirms the differentially expressed genes of RNA-seq data.**

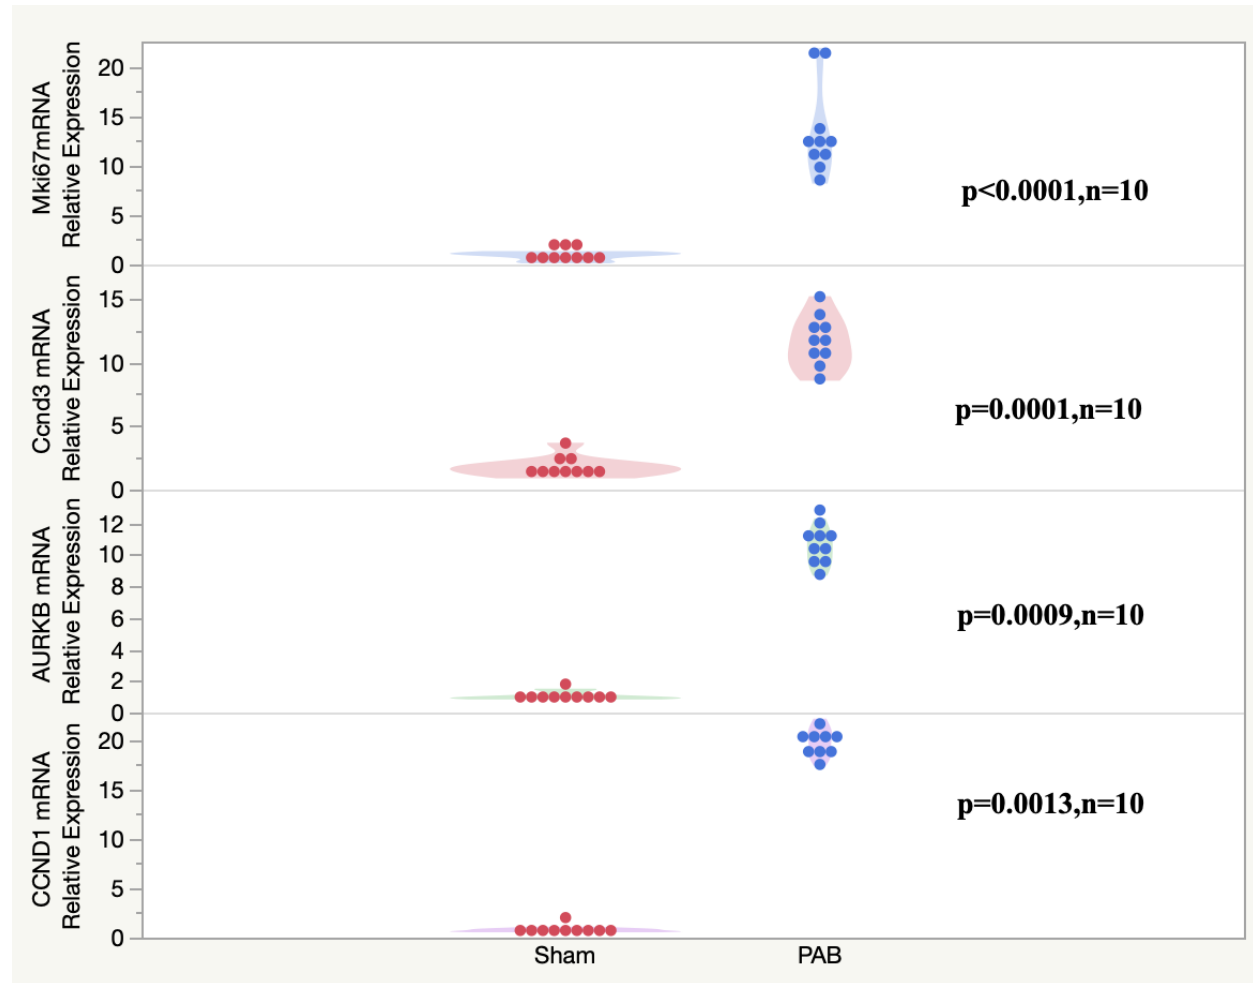

*AURKB* is one of the most important markers of cell division. RNA-seq data (GSE139561) showed that the average FPKM of *AURKB* in the PAB group was  $9.54 \pm 1.07$  and in the sham group was  $4.21 \pm 0.42$ . Qrt-PCR results showed that the relative mRNA level of *AURKB* increased ~10 fold. RNA-seq data (GSE139561) showed that the average FPKM of *CCND1* in the PAB group was  $22.8 \pm 6.2$  and in the sham group was  $7.78 \pm 1.12$ . qRT-PCR results showed that the relative mRNA level of *CCND1* increased ~20 fold. The other two cell cycle related genes *Mki67* and *Ccnd3* were also significantly increased.

**Figure S3. The top 24 differentially expressed genes from RNA-seq data.**

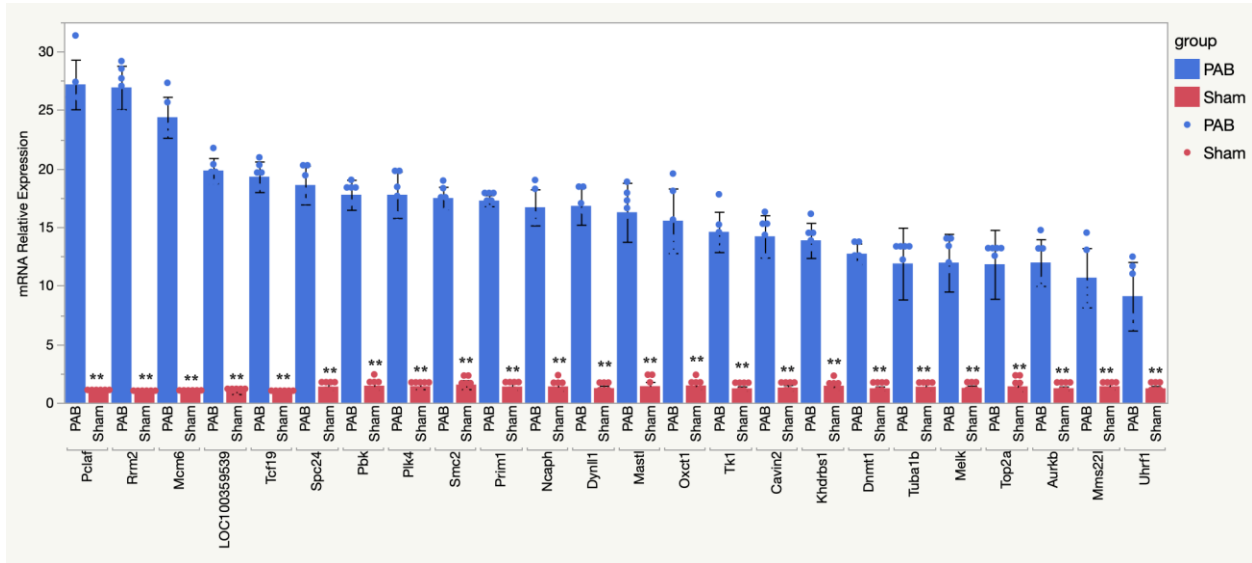

\*\*P<0.01,n=10.

**Figure S4 Quantification of the percentage of Ki67 and pHH3 positive cardiomyocytes in sham and PAB rats at P7.**

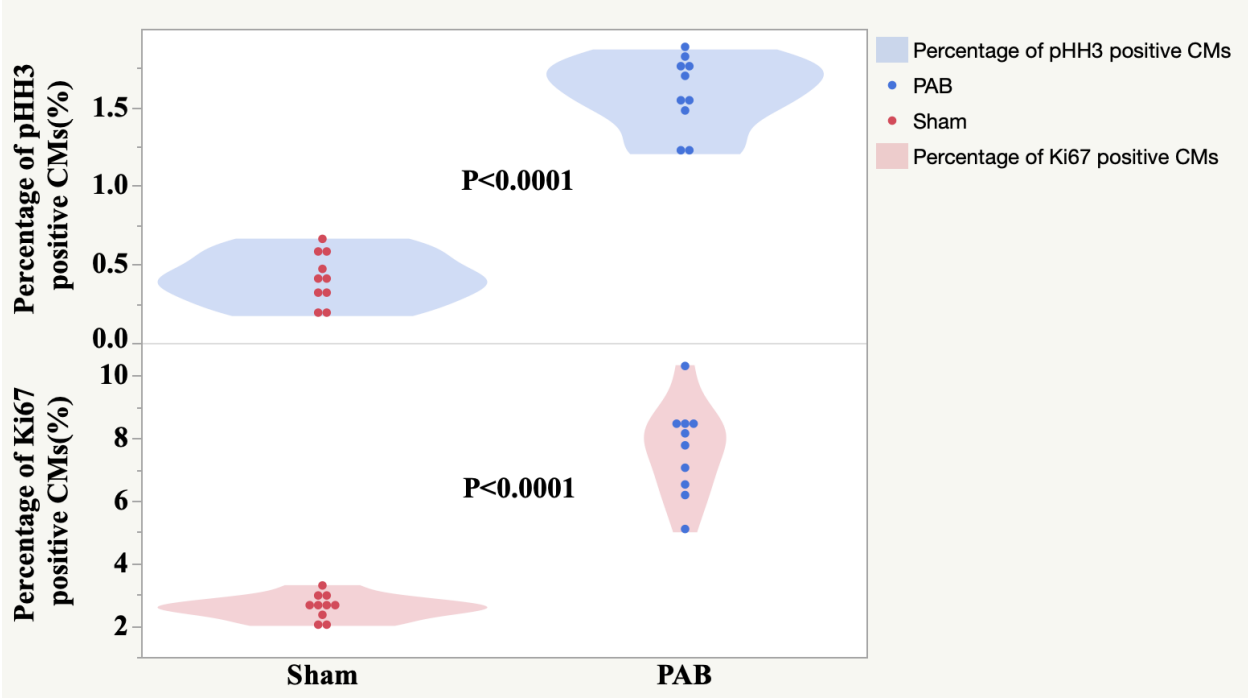

**Figure S5. Nucleoside uptake confirms that pressure overload greatly promotes RVCM proliferation.**

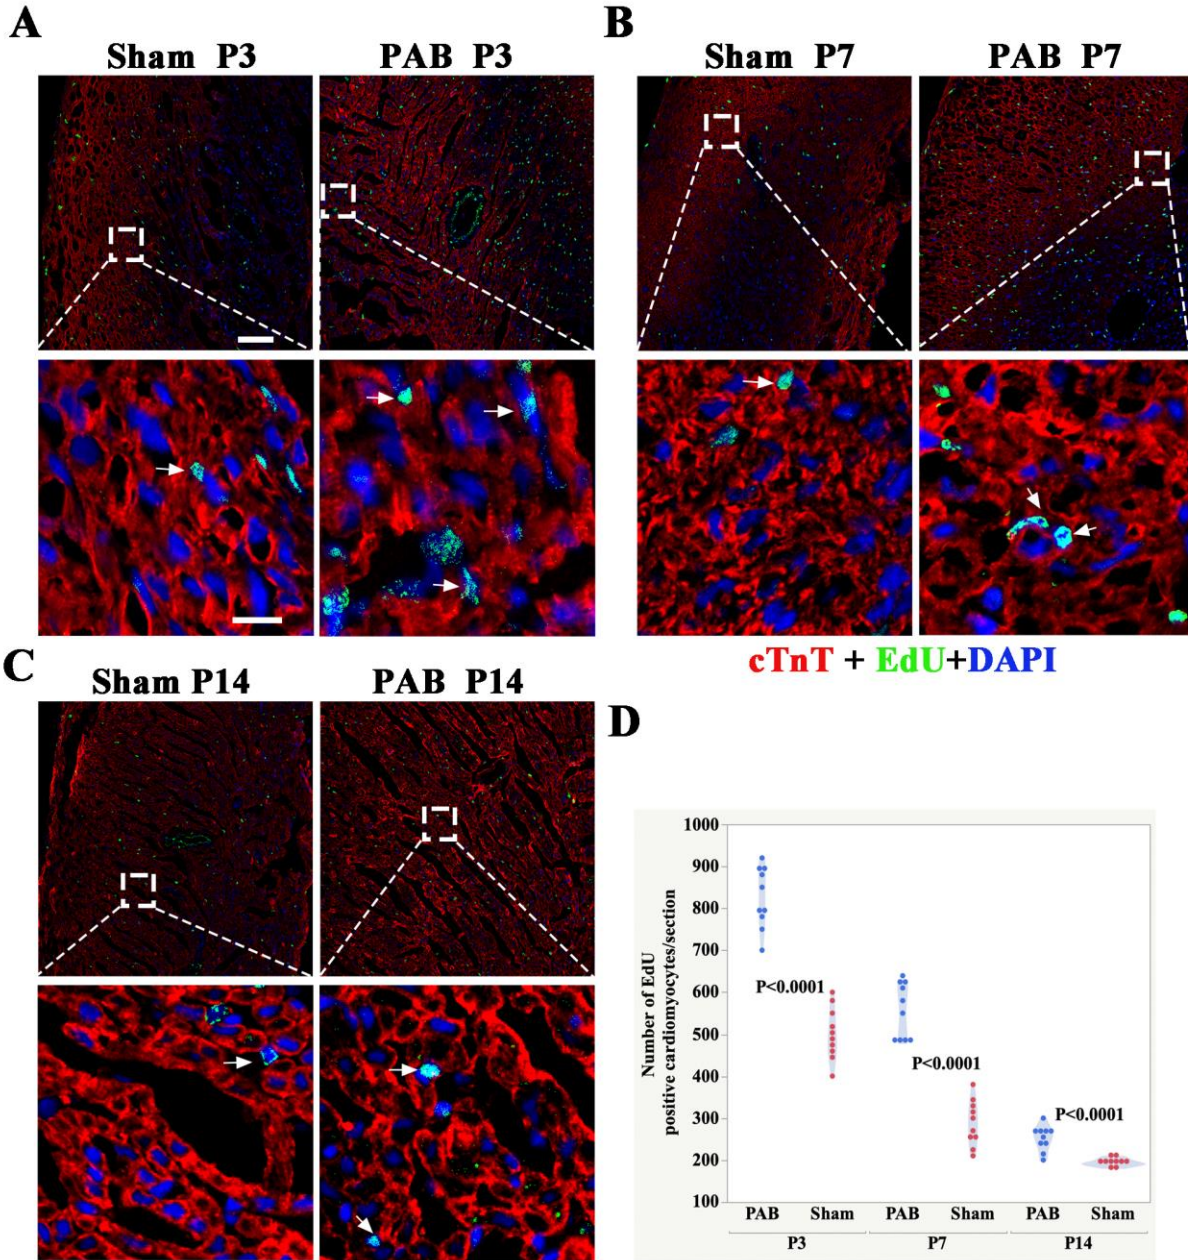

Representative graph of EdU-positive cardiomyocytes at P3(A), at P7(B), and at P14(C). (D) Quantification of EdU -positive cardiomyocytes at P7. Arrows indicate proliferating cardiomyocytes. EdU (green), cardiac troponin T (red) and DAPI (blue).
